# Supplementary material for: Two-dimensional 14N HYSCORE spectroscopy of the coordination geometry of ligands in dimanganese di-μ-oxo mimics of the oxygen evolving complex of photosystem II
Source: Royal Society of Chemistry journal article supplement (doi:10.1039/c2cp40416h), 2012-01-01

## Supplementary Information

### Two-Dimensional $^{14}\text{N}$ HYSCORE Spectroscopy of the Coordination Geometry of Ligands in Dimanganese Di- $\mu$ -oxo Mimics of the Oxygen Evolving Complex of Photosystem II<sup>†</sup>

*Ruchira Chatterjee,<sup>1</sup> Sergey Milikisiyants<sup>1</sup> and K. V. Lakshmi<sup>1,\*</sup>*

<sup>1</sup>Department of Chemistry and Chemical Biology and

The Baruch '60 Center for Biochemical Solar Energy Research

Rensselaer Polytechnic Institute

Troy, NY 12180

**One-sentence summary:** A Two-Dimensional  $^{14}\text{N}$  HYSCORE Study of Dimanganese Di- $\mu$ -oxo Mimics of the Oxygen-Evolving Complex of Photosystem II.

<sup>†</sup>This study is supported by the Solar Energy Utilization Program, Office of Basic Energy Sciences, U. S. Department of Energy under the contract DE-FG02-07ER15903.

\*Author for Correspondence:

K. V. Lakshmi

Department of Chemistry and Chemical Biology

Rensselaer Polytechnic Institute

Troy, NY 12180

Phone: (518) 276 3271

Fax: (518) 276 4887

Email: [lakshk@rpi.edu](mailto:lakshk@rpi.edu)

Key Words: Photosystem II, biomimetic models, mixed-valence coordination complexes, EPR spectroscopy, HYSCORE spectroscopy,  $[(\text{bpy})_2\text{Mn}^{\text{III}}(\mu\text{-O})_2\text{Mn}^{\text{IV}}(\text{bpy})_2](\text{ClO}_4)_3$  (bpy, 2,2'-bipyridine) and  $[\text{H}_2\text{O}(\text{terpy})\text{Mn}^{\text{III}}(\mu\text{-O})_2\text{Mn}^{\text{IV}}(\text{terpy})\text{OH}_2](\text{NO}_3)_3$  (terpy = 2,2':6',2''-terpyridine).

## Tables

**Table S1.** The experimentally determined  $^{14}\text{N}$  isotropic and anisotropic hyperfine interaction parameters of 2 in aqueous buffer.

**Table S1.**

| Complex                         | Nitrogen         | Assignment          | $A_{iso}$ (MHz) | $T$ (MHz)      | $K^2(3 + \eta^2)$ (MHz <sup>2</sup> ) |
|---------------------------------|------------------|---------------------|-----------------|----------------|---------------------------------------|
| <b>2</b><br>(Aqueous<br>buffer) | N <sub>I</sub>   | Mn(III), axial      | $13.1 \pm 1.0$  | $\sim 0.9$     | $1.8 \pm 0.5$                         |
|                                 | N <sub>II</sub>  | Mn(IV), axial       | $3.6 \pm 0.3$   | $\sim 0.2$     | $0.9 \pm 0.3$                         |
|                                 | N <sub>III</sub> | Mn(IV), equatorial  | $2.3 \pm 0.6$   | $\sim 0.5$     | $0.6 \pm 0.2$                         |
|                                 | N <sub>IV</sub>  | Mn(III), equatorial | $< 2.0$         | $\sim 0.6-1.3$ | $\sim 1.9$                            |

**Figure Legends.**

**Figure S1.** The 2D  $^{14}\text{N}$  HYSCORE spectrum of 2 in aqueous buffer at pH 4.3.

**Figure S1**

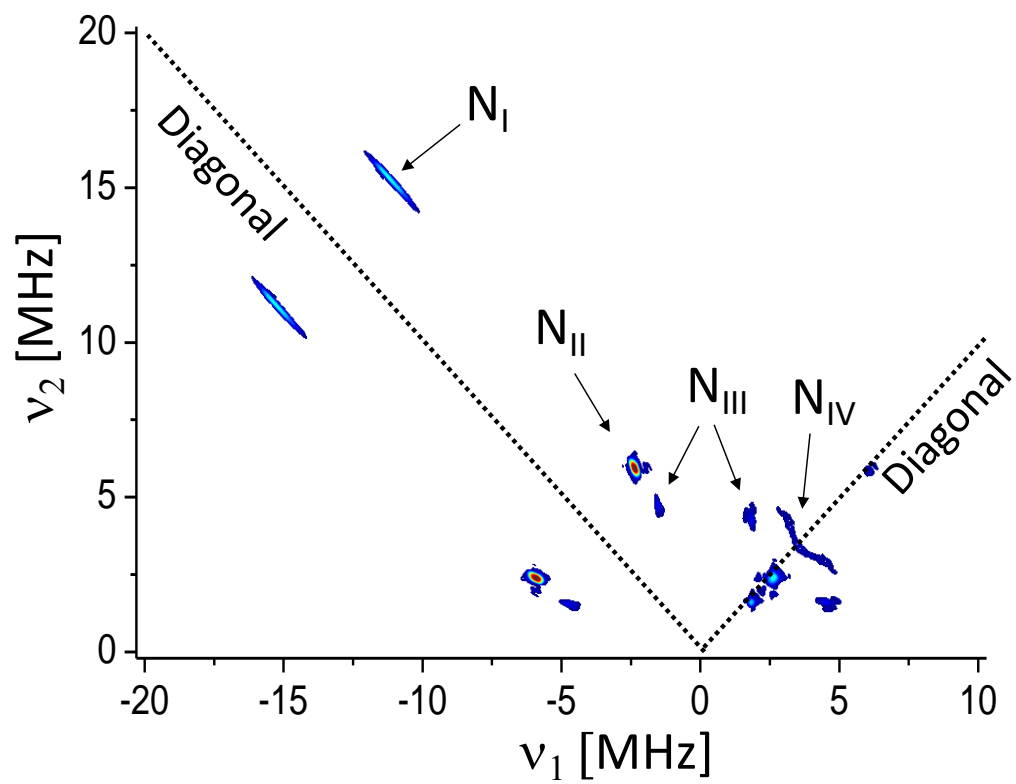

Supplement: c2cp40416h.pdf [file c2cp40416h.pdf]
